# Supplementary material for: Synthesis of four-armed triphenylamine-based molecules and their applications in organic solar cells
Source: Royal Society of Chemistry journal article supplement (doi:10.1039/c4nj01537a), 2014-11-19
Supplement: c4nj01537a1.pdf [file c4nj01537a1.pdf]

## Supplementary Materials

### Synthesis of four-armed triphenylamine-based molecules and their applications in organic solar cells

Tao Jia<sup>1</sup>, Zuosheng Peng<sup>2</sup>, Qi Li<sup>1</sup>, Tao Zhu<sup>1</sup>, Qiong Hou<sup>1,3\*</sup>, Lintao Hou<sup>2,3\*</sup>

<sup>1</sup>School of Chemistry & Environment, South China Normal University, Guangzhou 510006, China

<sup>2</sup>Siyuan Laboratory, Department of Physics, Jinan University, Guangzhou 510632, China

<sup>3</sup>State Key Laboratory of Luminescent Materials and Devices, South China University of Technology, Guangzhou 510641, China

Correspondence to: Qiong Hou (E-mail: houqiong@scnu.edu.cn); Lintao Hou (E-mail: thlt@jnu.edu.cn);

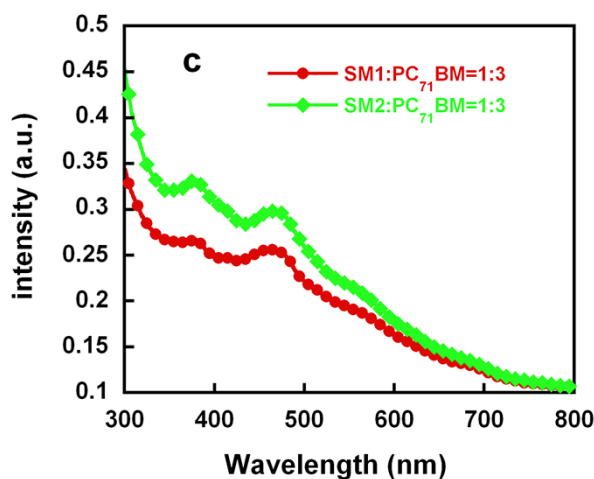

Fig. S1 UV-vis absorption spectra of small molecule/PC<sub>71</sub>BM (1:3, w/w) blend film (non-normalized)

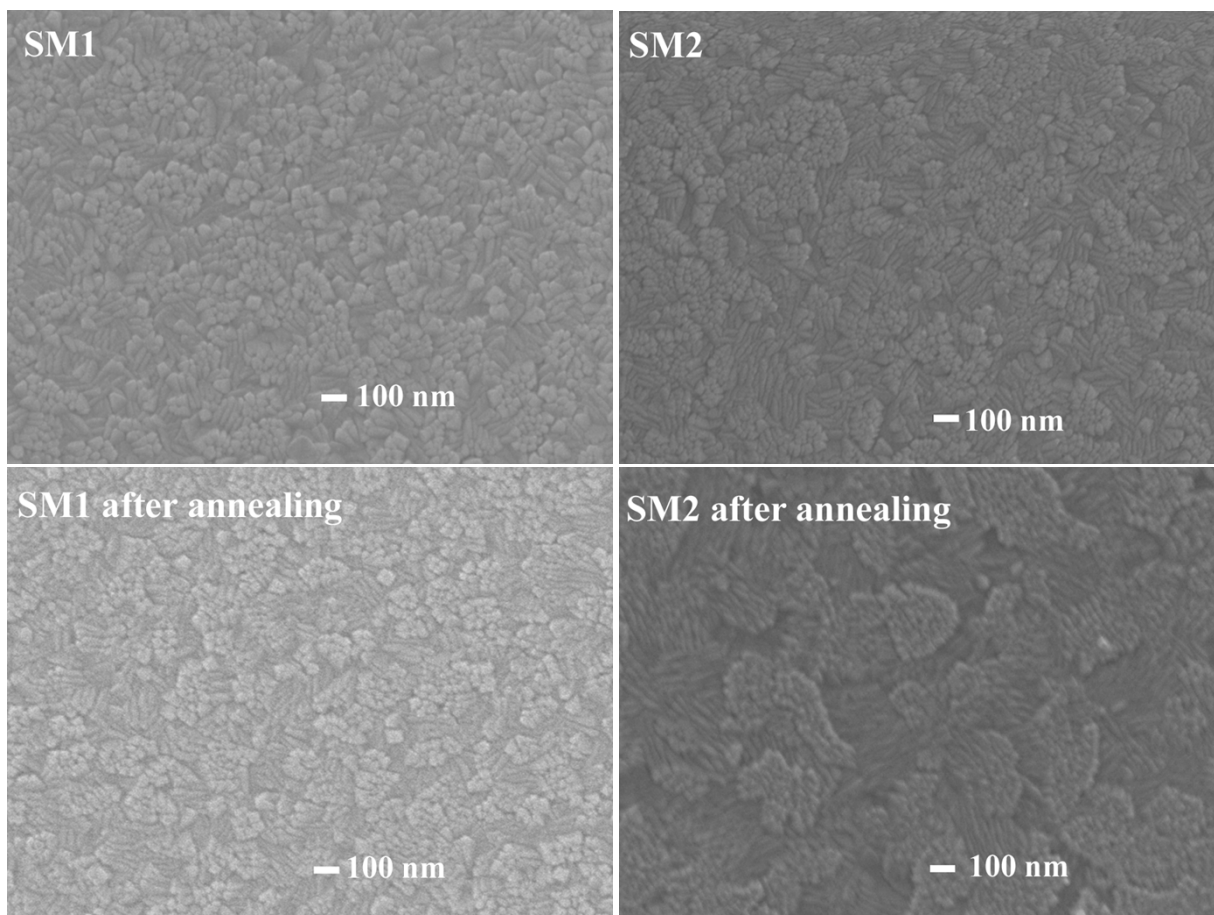

Fig. S2 SEM micrographs of SM1/PC<sub>71</sub>BM (1:3, w/w) and SM2/PC<sub>71</sub>BM (1:3, w/w) (15KV, ×50000)

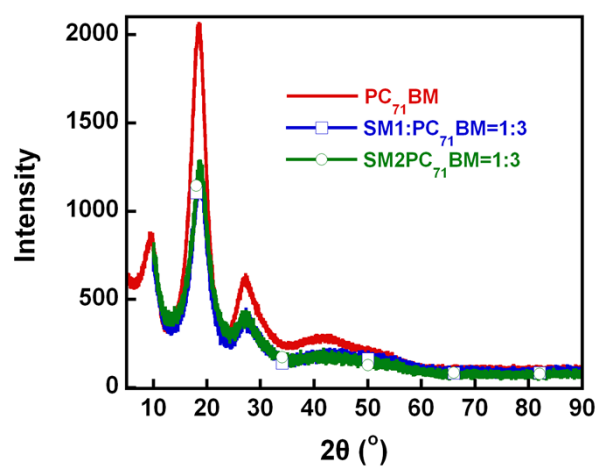

Fig. S3 WAXD patterns of PC<sub>71</sub>BM, SM1/PC<sub>71</sub>BM blend and SM2/PC<sub>71</sub>BM blend (1:3, w/w)

**Table S1** The average values and errors of  $J_{sc}$ ,  $V_{oc}$ , FF and PCE for OSCs based on SM1 and SM2 donors

| Small molecules | Donor:PC <sub>71</sub> BM<br>(weight ratios) | $J_{sc}$ /mA cm <sup>-2</sup> | $V_{oc}$ /V | FF (%)    | PCE (%)   |
|-----------------|----------------------------------------------|-------------------------------|-------------|-----------|-----------|
| SM1             | 1:2                                          | 5.70±0.15                     | 0.81±0.01   | 29.5±0.05 | 1.36±0.08 |
|                 | 1:3                                          | 6.13±0.15                     | 0.83±0.01   | 31.5±0.05 | 1.60±0.05 |
|                 | 1:4                                          | 4.90±0.10                     | 0.81±0.01   | 26.6±0.06 | 1.06±0.05 |
|                 | 1:3 <sup>a</sup>                             | 3.33±0.16                     | 0.63±0.01   | 32.2±0.05 | 0.68±0.05 |
| SM2             | 1:2                                          | 6.30±0.18                     | 0.83±0.01   | 33.1±0.06 | 1.73±0.09 |
|                 | 1:3                                          | 6.70±0.10                     | 0.85±0.01   | 35.5±0.05 | 2.02±0.08 |
|                 | 1:4                                          | 5.40±0.16                     | 0.84±0.01   | 28.3±0.06 | 1.28±0.09 |
|                 | 1:3 <sup>a</sup>                             | 4.62±0.15                     | 0.60±0.01   | 33.7±0.05 | 0.93±0.07 |

The average values and errors of  $J_{sc}$ ,  $V_{oc}$ , FF and PCE were obtained from twelve cells

<sup>a</sup> Thermal annealing at 120°C for 10 min.
